# Supplementary material for: Genetic and clinical landscape of breast cancers with germline BRCA1/2 variants
Source: PubMed Central journal article supplement (PMC7567851; doi:10.1038/s42003-020-01301-9), 2020-10-16

**Supplementary Information for**  
**Genetic and clinical landscape of breast cancers with germline *BRCA1/2* variants**

Yukiko Inagaki-Kawata<sup>1,2</sup>, Kenichi Yoshida<sup>1</sup>, Nobuko Kawaguchi-Sakita<sup>3</sup>, Masahiro Kawashima<sup>2</sup>,  
Tomomi Nishimura<sup>1,2</sup>, Noriko Senda<sup>2</sup>, Yusuke Shiozawa<sup>1</sup>, Yasuhide Takeuchi<sup>1, 15, 16</sup>, Yoshikage  
Inoue<sup>1</sup>, Aiko Sato-Otsubo<sup>1</sup>, Yoichi Fujii<sup>1</sup>, Yasuhito Nannya<sup>1</sup>, Eiji Suzuki<sup>2</sup>, Masahiro Takada<sup>2</sup>, Hiroko  
Tanaka<sup>18</sup>, Yuichi Shiraishi<sup>4</sup>, Kenichi Chiba<sup>4</sup>, Yuki Kataoka<sup>5</sup>, Masae Torii<sup>6</sup>, Hiroshi Yoshibayashi<sup>6</sup>,  
Kazuhiko Yamagami<sup>7</sup>, Ryuji Okamura<sup>8</sup>, Yoshio Moriguchi<sup>9</sup>, Hironori Kato<sup>10</sup>, Shigeru Tsuyuki<sup>11</sup>,  
Akira Yamauchi<sup>12</sup>, Hirofumi Suwa<sup>13</sup>, Takashi Inamoto<sup>14</sup>, Satoru Miyano<sup>4,18</sup>, Seishi Ogawa<sup>1, 15, 17</sup>  
and Masakazu Toi<sup>2</sup>

1. Department of Pathology and Tumor Biology, Kyoto University, Kyoto, Japan; 2. Department of Breast Surgery, Kyoto University, Kyoto, Japan; 3. Department of Clinical Oncology, Kyoto University Hospital, Kyoto, Japan; 4. Laboratory of DNA Information Analysis, Human Genome Center, Institute of Medical Science, The University of Tokyo, Tokyo, Japan; 5. Hospital Care Research Unit/ Department of Respiratory Medicine, Hyogo Prefectural Amagasaki General Medical Center, Amagasaki, Japan; 6. Department of Breast Surgery, Japanese Red Cross Wakayama Medical Center, Wakayama, Japan; 7. Department of Breast Surgery, Shinko Hospital, Kobe, Japan; 8. Department of Breast Surgery, Yamatotakada Municipal Hospital, Yamatotakada, Japan; 9. Department of Breast Surgery, Kyoto City Hospital, Kyoto, Japan; 10. Department of Breast Surgery, Kobe City Medical Center General Hospital, Kobe, Japan; 11. Department of Breast Surgery, Osaka Red Cross Hospital, Osaka, Japan; 12. Department of Breast Surgery, Kitano Hospital, Osaka, Japan; 13. Department of Breast Surgery, Hyogo Prefectural Amagasaki General Medical Center, Amagasaki, Japan; 14. Tenri Health Care University, Tenri, Japan; 15. Institute for the Advanced Study of Human Biology (WPI-ASHBi), Kyoto University, Kyoto, Japan; 16. Department of Diagnostic Pathology, Kyoto University, Kyoto, Japan; 17. Department of Medicine, Centre for Haematology and Regenerative Medicine, Karolinska Institute, Stockholm, Sweden; 18 Laboratory of Sequence Analysis, Human Genome Centre, Institute of Medical Science, The University of Tokyo, Tokyo, Japan

Correspondence to:

Prof. Seishi Ogawa

Pathology and Tumor Biology, Kyoto University, Yoshida-Konoe-cho, Sakyo-ku, Kyoto, 606-8501, Japan.

Phone: +81-75-753-9285; E-mail: sogawa-tky@umin.ac.jp

Prof. Masakazu Toi

Breast Cancer Unit, Kyoto University Hospital

Breast Surgery, Graduate School of Medicine, Kyoto University

54 Shogoin-Kawaracho, Sakyo-ku, Kyoto 606-8507, Japan

Phone: +81-75-751-3660; E-mail: [toi@kuhp.kyoto-u.ac.jp](mailto:toi@kuhp.kyoto-u.ac.jp)

**Supplementary Table**

**Supplementary Table 1. Pathogenic germline variants identified in 1,995 breast cancer patients.**

**Supplementary Table 2. Characteristics of patients carrying germline variants for each gene.**

**Supplementary Table 3. Germline mutations in subgroups according to family history of breast cancer and ovarian cancer.**

**Supplementary Table 4. Multivariate analysis of survival in breast cancer patients.**

**Supplementary Table 5. Genes for targeted sequencing of tumor samples.**

**Supplementary Table 6. Driver mutations identified in 60 breast tumors.**

**Supplementary Table 7. The landscape of driver mutations in patients who have germline *BRCA1/2* variants.**

**Supplementary Table 8. Clinical correlates with *BRCA1/2* biallelic inactivation.**

**Supplementary Table 9. Multivariate analysis of survival with biallelic inactivation of *BRCA1/2* as a covariate.**

**Supplementary Figure legends:**

**Supplementary Figure 1. Study design.**

**a.** A total of 2,136 breast cancer patients were enrolled in this study who were treated through Kyoto Breast Cancer Research Network institutions. Among these, 1,995 cases fulfilled the inclusion criteria. **b.** Flow chart of judgement of pathogenic germline variants.

**Supplementary Figure 2. Pathogenic mutations identified in 11 breast cancer susceptibility genes in 1,995 unselected breast cancer patients.**

Distribution of pathogenic variants on each gene. Locations of identified pathogenic variants are shown with the protein domains shown by lollipop structures. Variant types are indicated by colors.

**Supplementary Figure 3. Clinical characteristics of breast tumors harboring pathogenic germline variants.**

**a.** Distribution of age at diagnosis in patients according to the mutated genes (below). **b.** Frequency of germline mutations by the age at onset in 15-year-age groupings. **c.** Distribution of T factor by 3 age groupings and the status of germline mutation. **d.** Distribution of N factor according to the status of germline mutation.

**Supplementary Figure 4. Disease-free and overall survival of patients with and without germline variants.**

**a.** Kaplan-Meier disease-free survival curve for patients with and without germline variants. **b.** Kaplan-Meier overall survival curve for patients with and without germline variants.

**Supplementary Figure 5. Genetic lesions associated with germline *BRCA1/2* mutations and biallelic inactivation.**

**a.** Mutational signatures identified in breast tumors with *BRCA1/2* germline mutations: signature characterized by T>C mutations caused by microsatellite instability (Sig\_1), age-related C>T mutations at CpG sites (Sig\_2), mutational signature caused by deficient HR (Sig\_3), and APOBEC-related signature (Sig\_4). **b.** Number of single nucleotide variants (SNVs) and indels, and proportion of each mutational signature in tumors with *BRCA1/2* germline mutations. **c.** Relationship between the number of Sig\_3 mutations and status of *BRCA1/2* mutations and biallelic inactivation in TCGA dataset (n = 778), including *BRCA*(-) (n = 744), *BRCA2* tumor with (n = 14) and without (n = 4) biallelic inactivation and *BRCA1* tumor with (n = 15) and without (n = 1) biallelic inactivation. **d.** Number and types of SVs in in tumors with *BRCA1/2* germline mutations. **e.** Relationship between the number of deletions and tandem duplications and status

of *BRCA1/2* mutations and biallelic inactivation in TCGA dataset (n = 778). **f.** Frequently mutated driver genes in breast tumors with *BRCA1/2* germline mutations with and without biallelic inactivation.

**Supplementary Figure 6. VAFs of *TP53* and *RB1* mutations with *BRCA1/2*-mutated tumors with LOH.**

**a.** VAFs of mutations on chromosome 17 of tumors with germline *BRCA1* mutations and LOH in TCGA cohort. VAFs of *TP53* mutations are shown in red dotted lines. **b.** VAFs of mutations on chromosome 13 of tumors with germline *BRCA2* mutations and LOH in TCGA cohort. VAFs of *RB1* mutations are shown in red dotted lines.

**Supplementary Figure 7. Disease-free and overall survival of *BRCA1/2*-mutated patients with and without biallelic inactivation.**

**a.** Kaplan-Meier disease-free survival curve for *BRCA1/2*-mutated patients with/without biallelic inactivation and those without germline mutations in our data set. **b.** Kaplan-Meier overall survival curve for *BRCA1/2*-mutated patients with/without biallelic inactivation and those without germline mutations in our data set.

**Supplementary Figure 8. Comparison with the previous study.**

For TCGA samples, our study (Inagaki-Kawata et al.,) and the previous study (Maxwell et al.) analyzed 24 samples in common, for which results of both studies are compared. Thirteen samples were exclusively analyzed by Maxwell et al., for which exclusion criteria in our study are shown.

**Supplementary Figure 9. Validation of mutation and copy number calling**

**a.** Comparison of mutations called by EBCall and MuTect. Distribution of VAFs of mutations called by both methods and those called by either one of the two are shown in right. **b.** Identification of gain with LOH based on the estimated tumor purities by total and allele specific (As) copy number (CN). **c.** Correlation of the LOH status of *BRCA1/2* loci determined by CNACS and Control-FREEC.

**Supplementary Figure 10. Comparison of copy number analysis by CNACS and SNP array**

Total and allele specific copy numbers of 5 tumors estimated by sequencing (CNACS) and SNP array karyotyping are shown. Regions with LOH determined by SNP array are shown in orange bars.

**Supplementary Table 1. Pathogenic germline variants identified in 1,995 breast cancer patients**

| No. of patients | Chr | Start     | End       | Ref    | Alt    | Gene  | Function             | AACChange                                     |
|-----------------|-----|-----------|-----------|--------|--------|-------|----------------------|-----------------------------------------------|
| 1               | 11  | 108160488 | 108160488 | C      | T      | ATM   | Nonsense SNV         | NM_000051:exon29:c.C4396T:p.R1466X            |
| 1               | 11  | 108202644 | 108202647 | TTTG   | -      | ATM   | Frameshift deletion  | NM_000051:exon52:c.7668_7671del:p.T2556fs     |
| 1               | 11  | 108202673 | 108202676 | CAAA   | -      | ATM   | Frameshift deletion  | NM_000051:exon52:c.7697_7700del:p.A2566fs     |
| 1               | 17  | 41197784  | 41197784  | G      | A      | BRCA1 | Nonsense SNV         | NM_007294:exon23:c.C5503T:p.R1835X            |
| 1               | 17  | 41215382  | 41215382  | G      | A      | BRCA1 | Nonsense SNV         | NM_007294:exon18:c.C5161T:p.Q1721X            |
| 1               | 17  | 41222967  | 41222967  | G      | A      | BRCA1 | Missense SNV         | NM_007294:exon15:c.C4964T:p.S1655F            |
| 1               | 17  | 41243025  | 41243026  | CT     | -      | BRCA1 | Frameshift deletion  | NM_007294:exon11:c.4120_4121del:p.S1374fs     |
| 1               | 17  | 41243777  | 41243778  | CT     | -      | BRCA1 | Frameshift deletion  | NM_007294:exon10:c.3770_3771del:p.E1257fs     |
| 1               | 17  | 41244135  | 41244135  | C      | -      | BRCA1 | Frameshift deletion  | NM_007294:exon10:c.3413delG:p.G1138fs         |
| 1               | 17  | 41244426  | 41244426  | G      | C      | BRCA1 | Nonsense SNV         | NM_007294:exon10:c.C3122G:p.S1041X            |
| 2               | 17  | 41244748  | 41244748  | G      | A      | BRCA1 | Nonsense SNV         | NM_007294:exon10:c.C2800T:p.Q934X             |
| 1               | 17  | 41245279  | 41245279  | C      | -      | BRCA1 | Frameshift deletion  | NM_007294:exon10:c.2269delG:p.V757fs          |
| 2               | 17  | 41258497  | 41258497  | A      | T      | BRCA1 | Nonsense SNV         | NM_007294:exon4:c.T188A:p.L63X                |
| 2               | 17  | 41267797  | 41267797  | C      | T      | BRCA1 | Splice site          | NM_007294:exon3:c.81-1G>A                     |
| 1               | 17  | 41276047  | 41276047  | -      | T      | BRCA1 | Frameshift insertion | NM_007294:exon2:c.66dupA:p.E23fs              |
| 1               | 13  | 32893406  | 32893407  | CT     | -      | BRCA2 | Frameshift deletion  | NM_000059:exon3:c.260_261del:p.T87fs          |
| 1               | 13  | 32893464  | 32893464  | T      | C      | BRCA2 | Splice site          | NM_000059:exon3:c.316+2T>C                    |
| 1               | 13  | 32899298  | 32899298  | -      | CTAAAT | BRCA2 | Frameshift insertion | NM_000059:exon4:c.402_403insCTAAATTC:p.L134fs |
| 1               | 13  | 32903578  | 32903578  | A      | G      | BRCA2 | Splice site          | NM_000059:exon8:c.632-2A>G                    |
| 1               | 13  | 32906628  | 32906628  | C      | -      | BRCA2 | Frameshift deletion  | NM_000059:exon10:c.1013delC:p.A338fs          |
| 1               | 13  | 32906889  | 32906889  | A      | -      | BRCA2 | Frameshift deletion  | NM_000059:exon10:c.1274delA:p.E425fs          |
| 1               | 13  | 32907014  | 32907014  | A      | T      | BRCA2 | Nonsense SNV         | NM_000059:exon10:c.A1399T:p.K467X             |
| 3               | 13  | 32907421  | 32907421  | A      | -      | BRCA2 | Frameshift deletion  | NM_000059:exon10:c.1806delA:p.G602fs          |
| 1               | 13  | 32911133  | 32911133  | G      | T      | BRCA2 | Nonsense SNV         | NM_000059:exon11:c.G2641T:p.E881X             |
| 3               | 13  | 32911298  | 32911301  | AAAC   | -      | BRCA2 | Frameshift deletion  | NM_000059:exon11:c.2806_2809del:p.K936fs      |
| 1               | 13  | 32911684  | 32911687  | AATT   | -      | BRCA2 | Frameshift deletion  | NM_000059:exon11:c.3192_3195del:p.S1064fs     |
| 2               | 13  | 32911725  | 32911725  | T      | -      | BRCA2 | Frameshift deletion  | NM_000059:exon11:c.3233delT:p.V1078fs         |
| 1               | 13  | 32912432  | 32912432  | A      | T      | BRCA2 | Nonsense SNV         | NM_000059:exon11:c.A3940T:p.K1314X            |
| 1               | 13  | 32913030  | 32913033  | ATGA   | -      | BRCA2 | Frameshift deletion  | NM_000059:exon11:c.4538_4541del:p.D1513fs     |
| 1               | 13  | 32913464  | 32913464  | C      | T      | BRCA2 | Nonsense SNV         | NM_000059:exon11:c.C4972T:p.Q1658X            |
| 1               | 13  | 32913971  | 32913975  | ATTAA  | -      | BRCA2 | Frameshift deletion  | NM_000059:exon11:c.5479_5483del:p.I1827fs     |
| 13              | 13  | 32914066  | 32914069  | AATT   | -      | BRCA2 | Frameshift deletion  | NM_000059:exon11:c.5574_5577del:p.T1858fs     |
| 2               | 13  | 32914110  | 32914113  | TAAT   | -      | BRCA2 | Frameshift deletion  | NM_000059:exon11:c.5618_5621del:p.V1873fs     |
| 1               | 13  | 32914137  | 32914137  | C      | A      | BRCA2 | Nonsense SNV         | NM_000059:exon11:c.C5645A:p.S1882X            |
| 2               | 13  | 32914459  | 32914460  | AG     | -      | BRCA2 | Frameshift deletion  | NM_000059:exon11:c.5967_5968del:p.S1989fs     |
| 3               | 13  | 32914894  | 32914898  | TAAC   | -      | BRCA2 | Frameshift deletion  | NM_000059:exon11:c.6402_6406del:p.N2134fs     |
| 1               | 13  | 32914974  | 32914977  | ACAA   | -      | BRCA2 | Frameshift deletion  | NM_000059:exon11:c.6482_6485del:p.D2161fs     |
| 1               | 13  | 32915042  | 32915042  | C      | T      | BRCA2 | Nonsense SNV         | NM_000059:exon11:c.C6550T:p.Q2184X            |
| 1               | 13  | 32915089  | 32915089  | T      | -      | BRCA2 | Frameshift deletion  | NM_000059:exon11:c.6597delT:p.T2199fs         |
| 1               | 13  | 32915109  | 32915112  | AAAC   | -      | BRCA2 | Frameshift deletion  | NM_000059:exon11:c.6617_6620del:p.K2206fs     |
| 1               | 13  | 32915141  | 32915141  | A      | T      | BRCA2 | Nonsense SNV         | NM_000059:exon11:c.A6649T:p.K2217X            |
| 5               | 13  | 32920978  | 32920978  | C      | T      | BRCA2 | Nonsense SNV         | NM_000059:exon13:c.C6952T:p.R2318X            |
| 1               | 13  | 32929289  | 32929308  | AAAGCA | -      | BRCA2 | Frameshift deletion  | NM_000059:exon14:c.7299_7318del:p.Q2433fs     |
| 1               | 13  | 32930609  | 32930609  | C      | T      | BRCA2 | Nonsense SNV         | NM_000059:exon15:c.C7480T:p.R2494X            |
| 1               | 13  | 32930687  | 32930687  | C      | T      | BRCA2 | Nonsense SNV         | NM_000059:exon15:c.C7558T:p.R2520X            |
| 1               | 13  | 32931938  | 32931939  | TT     | -      | BRCA2 | Frameshift deletion  | NM_000059:exon16:c.7677_7678del:p.S2559fs     |
| 1               | 13  | 32937362  | 32937362  | A      | G      | BRCA2 | Missense SNV         | NM_000059:exon18:c.A8023G:p.I2675V            |
| 1               | 13  | 32945095  | 32945095  | G      | A      | BRCA2 | Nonsense SNV         | NM_000059:exon20:c.G8490A:p.W2830X            |
| 1               | 13  | 32945141  | 32945141  | G      | T      | BRCA2 | Nonsense SNV         | NM_000059:exon20:c.G8536T:p.E2846X            |
| 1               | 13  | 32950810  | 32950811  | AC     | -      | BRCA2 | Frameshift deletion  | NM_000059:exon21:c.8636_8637del:p.N2879fs     |
| 1               | 13  | 32954009  | 32954009  | C      | T      | BRCA2 | Nonsense SNV         | NM_000059:exon23:c.C9076T:p.Q3026X            |
| 1               | 13  | 32954050  | 32954050  | G      | A      | BRCA2 | Synonymous SNV       | NM_000059:exon23:c.G9117A:p.P3039P            |
| 1               | 22  | 29085179  | 29085179  | G      | A      | CHEK2 | Nonsense SNV         | NM_007194:exon14:c.C1486T:p.Q496X             |
| 1               | 22  | 29121089  | 29121089  | G      | C      | CHEK2 | Nonsense SNV         | NM_007194:exon4:c.C468G:p.Y156X               |
| 1               | 22  | 29130478  | 29130478  | G      | A      | CHEK2 | Nonsense SNV         | NM_007194:exon2:c.C232T:p.Q78X                |
| 1               | 17  | 29528171  | 29528171  | -      | T      | NF1   | Frameshift insertion | NM_000267:exon10:c.1180dupT:p.H393fs          |
| 1               | 16  | 23619279  | 23619279  | G      | A      | PALB2 | Nonsense SNV         | NM_024675:exon12:c.C3256T:p.R1086X            |
| 1               | 16  | 23619288  | 23619289  | CA     | -      | PALB2 | Frameshift deletion  | NM_024675:exon12:c.3246_3247del:p.S1082fs     |
| 1               | 16  | 23632748  | 23632749  | AA     | -      | PALB2 | Frameshift deletion  | NM_024675:exon10:c.3047_3048del:p.F1016fs     |
| 1               | 16  | 23646314  | 23646314  | G      | C      | PALB2 | Nonsense SNV         | NM_024675:exon4:c.C1553G:p.S518X              |
| 1               | 16  | 23646315  | 23646316  | AT     | -      | PALB2 | Frameshift deletion  | NM_024675:exon4:c.1551_1552del:p.K517fs       |
| 2               | 16  | 23646636  | 23646636  | T      | A      | PALB2 | Nonsense SNV         | NM_024675:exon4:c.A1231T:p.R411X              |
| 1               | 16  | 23646810  | 23646811  | TC     | -      | PALB2 | Frameshift deletion  | NM_024675:exon4:c.1056_1057del:p.E352fs       |
| 1               | 16  | 23652472  | 23652472  | C      | A      | PALB2 | Nonsense SNV         | NM_024675:exon1:c.G7T:p.E3X                   |
| 1               | 10  | 89623773  | 89623774  | GA     | -      | PTEN  | Frameshift deletion  | NM_001304717:exon1:c.67_68del:p.E23fs         |
| 1               | 10  | 89685300  | 89685300  | C      | A      | PTEN  | Nonsense SNV         | NM_001304717:exon4:c.C714A:p.Y238X            |
| 1               | 10  | 89692905  | 89692905  | G      | A      | PTEN  | Missense SNV         | NM_001304717:exon6:c.G908A:p.R303Q            |
| 1               | 10  | 89720852  | 89720852  | C      | T      | PTEN  | Nonsense SNV         | NM_001304717:exon9:c.C1522T:p.R508X           |
| 1               | 17  | 7574017   | 7574017   | C      | T      | TP53  | Missense SNV         | NM_000546:exon10:c.G1010A:p.R337H             |
| 1               | 17  | 7578211   | 7578211   | C      | T      | TP53  | Missense SNV         | NM_000546:exon6:c.G638A:p.R213Q               |
| 1               | 17  | 7578388   | 7578388   | C      | T      | TP53  | Missense SNV         | NM_000546:exon5:c.G542A:p.R181H               |
| 1               | 17  | 7578457   | 7578457   | C      | T      | TP53  | Missense SNV         | NM_000546:exon5:c.G473A:p.R158H               |

**Supplementary Table 2. Characteristics of patients carrying germline variants for each gene**

|                    |                 | Germline mutation(+) (N=101) |              |              |              |             |             |            |            | Germline mutation (-) | All       |
|--------------------|-----------------|------------------------------|--------------|--------------|--------------|-------------|-------------|------------|------------|-----------------------|-----------|
|                    |                 | <i>BRCA2</i>                 | <i>BRCA1</i> | <i>PALB2</i> | <i>CHEK2</i> | <i>TP53</i> | <i>PTEN</i> | <i>ATM</i> | <i>NF1</i> | (N=1,894)             | (N=1,995) |
|                    |                 | (N=62)                       | (N=15)       | (N=9)        | (N=3)        | (N=4)       | (N=4)       | (N=3)      | (N=1)      |                       |           |
| Age                | ~35             | 8                            | 5            | 0            | 1            | 1           | 0           | 0          | 0          | 36                    | 51        |
|                    | 36~45           | 16                           | 3            | 2            | 0            | 0           | 2           | 0          | 1          | 293                   | 317       |
|                    | 46~55           | 6                            | 2            | 3            | 1            | 1           | 0           | 1          | 0          | 447                   | 461       |
|                    | 56~65           | 20                           | 3            | 1            | 1            | 0           | 1           | 0          | 0          | 496                   | 522       |
|                    | 66~             | 12                           | 2            | 3            | 0            | 2           | 1           | 2          | 0          | 622                   | 644       |
| Histology          | IDC             | 48                           | 11           | 8            | 2            | 1           | 4           | 1          | 1          | 1408                  | 1484      |
|                    | ILC             | 6                            | 1            | 0            | 1            | 0           | 0           | 0          | 0          | 66                    | 74        |
|                    | DCIS            | 6                            | 1            | 1            | 0            | 3           | 0           | 1          | 0          | 200                   | 212       |
|                    | others          | 2                            | 2            | 0            | 0            | 0           | 0           | 1          | 0          | 101                   | 106       |
| Phenotype          | ER +            | 50                           | 4            | 8            | 3            | 2           | 3           | 3          | 1          | 1466                  | 1540      |
|                    | ER -            | 10                           | 11           | 1            | 0            | 1           | 1           | 0          | 0          | 353                   | 377       |
|                    | HER2 +          | 6                            | 1            | 1            | 0            | 1           | 0           | 1          | 0          | 300                   | 310       |
|                    | HER2 -          | 51                           | 13           | 6            | 3            | 1           | 4           | 2          | 1          | 1301                  | 1382      |
|                    | Ki67 high (>14) | 40                           | 13           | 6            | 1            | 2           | 0           | 1          | 1          | 903                   | 967       |
| Histological grade | Ki67 low        | 10                           | 0            | 0            | 2            | 0           | 4           | 1          | 0          | 704                   | 721       |
|                    | 3               | 9                            | 9            | 4            | 1            | 0           | 0           | 1          | 1          | 121                   | 146       |
|                    | 2               | 19                           | 2            | 1            | 2            | 1           | 1           | 0          | 0          | 393                   | 419       |
| Clinical stage     | 1               | 9                            | 0            | 1            | 0            | 0           | 0           | 1          | 0          | 206                   | 217       |
|                    | 0               | 6                            | 1            | 1            | 0            | 3           | 1           | 1          | 0          | 241                   | 254       |
|                    | I               | 20                           | 2            | 2            | 0            | 0           | 3           | 0          | 0          | 747                   | 774       |
|                    | II              | 26                           | 9            | 2            | 3            | 1           | 0           | 0          | 1          | 691                   | 733       |
|                    | III             | 5                            | 2            | 1            | 0            | 0           | 0           | 2          | 0          | 132                   | 142       |
|                    | IV              | 4                            | 0            | 1            | 0            | 0           | 0           | 0          | 0          | 48                    | 53        |
| PH                 | Unknown         | 1                            | 1            | 2            | 0            | 0           | 0           | 0          | 0          | 35                    | 39        |
|                    | Ovarian cancer  | 3                            | 1            | 0            | 0            | 0           | 0           | 0          | 0          | 10                    | 14        |
| FH                 | Breast cancer   | 28                           | 5            | 1            | 2            | 1           | 1           | 1          | 0          | 309                   | 348       |
|                    | Ovarian cancer  | 3                            | 0            | 0            | 0            | 0           | 0           | 0          | 0          | 30                    | 33        |

Abbreviations: IDC, Invasive ductal carcinoma ; ILC, Invasive lobular carcinoma ; DCIS, Ductal carcinoma in situ ; ER, Estrogen receptor ; HER2, Human epidermal growth factor receptor 2 ; PH, Past history ; FH, Family history

**Supplementary Table 3. Germline mutations in subgroups according to family history of breast cancer and ovarian cancer**

|     | Patients, N | Mutation cases   |                  |            | Total (%) |
|-----|-------------|------------------|------------------|------------|-----------|
|     |             | <i>BRCA1</i> (%) | <i>BRCA2</i> (%) | Others (%) |           |
| FH+ | 372         | 5 (1.3)          | 30 (8.0)         | 6 (1.6)    | 41 (11.0) |
| FH- | 1,455       | 7 (0.5)          | 31 (2.1)         | 12 (0.8)   | 50 (3.4)  |
| NA  | 168         | 3                | 1                | 6          | 10        |

Abbreviations: FH, Family history



**Supplementary Table 4. Multivariate analysis of survival in breast cancer patients**

|                            | OS           |         |           | DFS          |         |          |
|----------------------------|--------------|---------|-----------|--------------|---------|----------|
|                            | Hazard ratio | P-value | 95% CI    | Hazard ratio | P-value | 95% CI   |
| Germline mutation positive | 0.44         | 0.21    | 0.071-1.5 | 0.64         | 0.21    | 0.28-1.3 |
| larger than T3             | 3.3          | 0.0020  | 1.6-6.8   | 2.8          | <0.0001 | 1.75-4.3 |
| LN status positive         | 2.5          | 0.0049  | 1.3-4.7   | 3.3          | <0.0001 | 2.3-4.9  |
| less than 55 y.o.          | 1.2          | 0.65    | 0.62-2.1  | 1.1          | 0.70    | 0.74-1.5 |
| TNBC                       | 3.3          | 0.0010  | 1.7-6.2   | 1.7          | 0.039   | 1.0-2.6  |

**Supplementary Table 5. Genes for targeted sequencing of tumor samples**

|                       |                  |                |                     |               |                     |
|-----------------------|------------------|----------------|---------------------|---------------|---------------------|
| <i>AKT1</i> *         | <i>PTEN</i> *    | <i>BRAF</i>    | <i>FANCA</i>        | <i>MYC</i>    | <i>SMARCD1</i>      |
| <i>ARID1A</i> *       | <i>RB1</i> *     | <i>BRIP1</i>   | <i>FGFR1</i>        | <i>NBN</i>    | <i>SRPR</i>         |
| <i>BRCA1</i> *        | <i>RUNX1</i> *   | <i>CCND1</i>   | <i>FGFR2</i>        | <i>NCOR2</i>  | <i>STK11</i>        |
| <i>BRCA2</i> *        | <i>SF3B1</i> *   | <i>CCND2</i>   | <i>FGFR3</i>        | <i>NRAS</i>   | <i>SYNE2</i>        |
| <i>CASP8</i> *        | <i>TBX3</i> *    | <i>CCND3</i>   | <i>FGFR4</i>        | <i>OR2G3</i>  | <i>TBL1XR1</i>      |
| <i>CBFB</i> *         | <i>TP53</i> *    | <i>CCNE1</i>   | <i>FOXO3</i>        | <i>PAK1</i>   | <i>TBX4</i>         |
| <i>CDH1</i> *         | <i>XBP1</i> *    | <i>CDK4</i>    | <i>GPS2</i>         | <i>PALB2</i>  | <i>TBX5</i>         |
| <i>CDKN1B</i> *       | <i>ZFP36L1</i> * | <i>CDK6</i>    | <i>IGF1R</i>        | <i>PDGFRA</i> | <i>TRIM6-TRIM34</i> |
| <i>CTCF</i> *         | <i>CDKN2A</i> ** | <i>CDKN2C</i>  | <i>IKBKB</i>        | <i>PIWIL1</i> | <i>TTN</i>          |
| <i>FOXA1</i> *        | <i>KRAS</i> **   | <i>CHD1</i>    | <i>INPP4B</i>       | <i>PNPLA3</i> | <i>UBR5</i>         |
| <i>GATA3</i> *        | <i>AFF2</i>      | <i>CHEK2</i>   | <i>JAK2</i>         | <i>PTPN22</i> | <i>USH2A</i>        |
| <i>MAP2K4</i> *       | <i>AKT2</i>      | <i>CSMD1</i>   | <i>KCNB2</i>        | <i>PTPRD</i>  | <i>WNT7A</i>        |
| <i>MAP3K1</i> *       | <i>AKT3</i>      | <i>DCAF4L2</i> | <i>KDM3A</i>        | <i>RAD51C</i> | <i>WWOX</i>         |
| <i>MED23</i> *        | <i>APOBEC3A</i>  | <i>DGKG</i>    | <i>KIT</i>          | <i>RECQL</i>  | <i>ZNF217</i>       |
| <i>MLL3 (KMT2C)</i> * | <i>APOBEC3B</i>  | <i>EGFR</i>    | <i>MAGI3</i>        | <i>RPGR</i>   | <i>ZNF703</i>       |
| <i>MYB</i> *          | <i>ATM</i>       | <i>ERBB2</i>   | <i>MAP3K13</i>      | <i>RSF1</i>   |                     |
| <i>NCOR1</i> *        | <i>ATN1</i>      | <i>ERBB3</i>   | <i>MCL1</i>         | <i>RYR2</i>   |                     |
| <i>NF1</i> *          | <i>ATP2B2</i>    | <i>ERRB</i>    | <i>MDM2</i>         | <i>SETD1A</i> |                     |
| <i>PIK3CA</i> *       | <i>ATR</i>       | <i>ESR1</i>    | <i>MET</i>          | <i>SETD2</i>  |                     |
| <i>PIK3R1</i> *       | <i>BCL2L1</i>    | <i>FAM47C</i>  | <i>MLL2 (KMT2D)</i> | <i>SMAD4</i>  |                     |

\* indicates 28 driver genes reported in Nik-Zainel et al., *Nature*. 2016.

\*\*indicates two genes with driver mutations reported in COSMIC database.



|       |       |   |    |          |          |         |   |        |                  |                                                   |       |
|-------|-------|---|----|----------|----------|---------|---|--------|------------------|---------------------------------------------------|-------|
| KU033 | BRCA2 | + | 7  | 1.52E+08 | 1.52E+08 | C       | T | KMT2C  | Missense         | KMT2C:NM_170606:exon51:c.G12674A:p.R4225Q         | 0.291 |
| KU033 | BRCA2 | + | 17 | 7578212  | 7578212  | G       | A | TP53   | Nonsense         | TP53:NM_000546:exon6:c.C637T:p.R213X              | 0.734 |
| KU034 | BRCA2 | - | 3  | 1.79E+08 | 1.79E+08 | A       | G | PIK3CA | Missense         | PIK3CA:NM_006218:exon21:c.A3140G:p.H1047R         | 0.035 |
| KU035 | BRCA2 | - | 3  | 1.79E+08 | 1.79E+08 | A       | G | PIK3CA | Missense         | PIK3CA:NM_006218:exon21:c.A3140G:p.H1047R         | 0.401 |
| KU035 | BRCA2 | - | 17 | 7577506  | 7577506  | C       | A | TP53   | Missense         | TP53:NM_000546:exon7:c.G775T:p.D259Y              | 0.13  |
| KU035 | BRCA2 | - | 17 | 11984782 | 11984782 | C       | T | MAP2K4 | Nonsense         | MAP2K4:NM_003010:exon3:c.C328T:p.R110X            | 0.155 |
| KU038 | BRCA2 | - | 3  | 1.79E+08 | 1.79E+08 | G       | A | PIK3CA | Missense         | PIK3CA:NM_006218:exon2:c.G241A:p.E81K             | 0.612 |
| KU038 | BRCA2 | - | 3  | 1.79E+08 | 1.79E+08 | A       | G | PIK3CA | Missense         | PIK3CA:NM_006218:exon21:c.A3140G:p.H1047R         | 0.639 |
| KU038 | BRCA2 | - | 5  | 56161243 | 56161243 | C       | G | MAP3K1 | Nonsense         | MAP3K1:NM_005921:exon5:c.C1112G:p.S371X           | 0.645 |
| KU038 | BRCA2 | - | 6  | 1.36E+08 | 1.36E+08 | T       | G | MYB    | Missense         | MYB:NM_001130173:exon10:c.T1489G:p.S497A          | 0.348 |
| KU038 | BRCA2 | - | 7  | 1.52E+08 | 1.52E+08 | G       | A | KMT2C  | Missense         | KMT2C:NM_170606:exon15:c.C2633T:p.A878V           | 0.11  |
| KU038 | BRCA2 | - | 12 | 25398284 | 25398284 | C       | T | KRAS   | Missense         | KRAS:NM_033360:exon2:c.G35A:p.G12D                | 0.436 |
| KU041 | BRCA2 | + | 5  | 67522729 | 67522729 | -       | A | PIK3R1 | Nonsense         | PIK3R1:NM_181523:exon2:c.227dupA:p.Y76_I77delinsX | 0.22  |
| KU041 | BRCA2 | + | 7  | 1.52E+08 | 1.52E+08 | T       | C | KMT2C  | Missense         | KMT2C:NM_170606:exon44:c.A11650G:p.T3884A         | 0.048 |
| KU041 | BRCA2 | + | 7  | 1.52E+08 | 1.52E+08 | T       | A | KMT2C  | Missense         | KMT2C:NM_170606:exon8:c.A1167T:p.K389N            | 0.027 |
| KU041 | BRCA2 | + | 7  | 1.52E+08 | 1.52E+08 | C       | A | KMT2C  | Missense         | KMT2C:NM_170606:exon7:c.G944T:p.G315V             | 0.058 |
| KU043 | BRCA2 | + | 3  | 1.79E+08 | 1.79E+08 | A       | G | PIK3CA | Missense         | PIK3CA:NM_006218:exon21:c.A3140G:p.H1047R         | 0.489 |
| KU043 | BRCA2 | + | 16 | 68847295 | 68847309 | AGCGTGC | - | CDH1   | Inframe indel    | CDH1:NM_004360:exon9:c.1217_1231del:p.406_411del  | 0.078 |
| KU045 | BRCA1 | + | 7  | 1.52E+08 | 1.52E+08 | G       | T | KMT2C  | Missense         | KMT2C:NM_170606:exon8:c.C11179A:p.N393K           | 0.033 |
| KU045 | BRCA1 | + | 17 | 7577031  | 7577031  | T       | - | TP53   | Frameshift indel | TP53:NM_000546:exon8:c.907delA:p.S303fs           | 0.626 |
| KU009 | BRCA1 | + | 17 | 7578484  | 7578484  | -       | A | TP53   | Frameshift indel | TP53:NM_000546:exon5:c.445dupT:p.S149fs           | 0.358 |

Supplementary Table 7. The landscape of driver mutations in patients who have germline *BRCA1/2* variants.

| Patient | Germline variant | LOH | Somatic variant                 |
|---------|------------------|-----|---------------------------------|
| KU043   | <i>BRCA2</i>     | del | <i>PIK3CA, CDH1</i>             |
| KU033   | <i>BRCA2</i>     | del | <i>TP53, KMT2C</i>              |
| KU041   | <i>BRCA2</i>     | del | <i>KMT2C, PIK3R1</i>            |
| KU021   | <i>BRCA2</i>     | del | <i>GATA3</i>                    |
| KU012   | <i>BRCA2</i>     | del | wt                              |
| KU089   | <i>BRCA2</i>     | del | <i>PIK3R1</i>                   |
| KU042   | <i>BRCA2</i>     | del | wt                              |
| KU037   | <i>BRCA2</i>     | del | wt                              |
| KU007   | <i>BRCA2</i>     | del | wt                              |
| KU006   | <i>BRCA2</i>     | del | wt                              |
| KU032   | <i>BRCA2</i>     | del | wt                              |
| KU028   | <i>BRCA2</i>     | del | wt                              |
| KU022   | <i>BRCA2</i>     | del | wt                              |
| KU011   | <i>BRCA2</i>     | del | wt                              |
| KU084   | <i>BRCA2</i>     | del | wt                              |
| KU091   | <i>BRCA2</i>     | del | wt                              |
| KU087   | <i>BRCA2</i>     | del | wt                              |
| KU038   | <i>BRCA2</i>     | wt  | <i>PIK3CA, KMT2C, KRAS</i>      |
| KU035   | <i>BRCA2</i>     | wt  | <i>PIK3CA, TP53</i>             |
| KU034   | <i>BRCA2</i>     | wt  | <i>PIK3CA</i>                   |
| KU005   | <i>BRCA2</i>     | wt  | <i>PIK3CA</i>                   |
| KU003   | <i>BRCA2</i>     | wt  | <i>KMT2C, KRAS</i>              |
| KU088   | <i>BRCA2</i>     | wt  | <i>KMT2C, CDH1, GATA3, PTEN</i> |
| KU019   | <i>BRCA2</i>     | wt  | <i>PTEN</i>                     |
| KU083   | <i>BRCA2</i>     | wt  | wt                              |
| KU045   | <i>BRCA1</i>     | amp | <i>TP53, KMT2C</i>              |
| KU009   | <i>BRCA1</i>     | del | <i>TP53</i>                     |
| KU085   | <i>BRCA1</i>     | UPD | <i>TP53</i>                     |
| KU016   | <i>BRCA1</i>     | wt  | <i>PIK3CA</i>                   |
| KU014   | <i>BRCA1</i>     | wt  | <i>TP53</i>                     |

Abbreviations: del, deletion ; amp, amplification ; UPD, uniparental disomy ; wt, wild type

**Supplementary Table 8. Clinical correlates with *BRCA1/2* biallelic inactivation**

| N                             | <i>BRCA</i> biallelic inactivation |    |              |    | Non <i>BRCA</i> |    | Without germline variants |      | Biallelic inactivation present vs. absent | <i>P</i> value                                               |                                                             |        |
|-------------------------------|------------------------------------|----|--------------|----|-----------------|----|---------------------------|------|-------------------------------------------|--------------------------------------------------------------|-------------------------------------------------------------|--------|
|                               | Present<br>49                      |    | Absent<br>15 |    | 24              |    | 1,894                     |      |                                           | Biallelic inactivation present vs. without germline variants | Biallelic inactivation absent vs. without germline variants |        |
|                               | N                                  | %  | N            | %  | N               | %  | N                         | %    |                                           |                                                              |                                                             |        |
| Avg Age diagnosis ( $\pm$ SD) |                                    |    |              |    |                 |    |                           |      |                                           |                                                              |                                                             |        |
| T                             |                                    |    |              |    |                 |    |                           |      |                                           |                                                              |                                                             |        |
|                               | is, 1                              | 13 | 26.5         | 7  | 46.7            | 12 | 50.0                      | 1071 | 56.5                                      |                                                              |                                                             |        |
|                               | 2,3,4                              | 32 | 65.3         | 5  | 33.3            | 10 | 41.7                      | 799  | 42.2                                      | 0.0884                                                       | 0.0002                                                      | 1.0000 |
| N                             |                                    |    |              |    |                 |    |                           |      |                                           |                                                              |                                                             |        |
|                               | 0                                  | 21 | 42.9         | 8  | 53.3            | 14 | 58.3                      | 1463 | 77.2                                      |                                                              |                                                             |        |
|                               | 1,2,3                              | 24 | 49.0         | 4  | 26.7            | 8  | 33.3                      | 398  | 21.0                                      | 0.3313                                                       | 0.0001                                                      | 0.2997 |
| Subtype                       |                                    |    |              |    |                 |    |                           |      |                                           |                                                              |                                                             |        |
|                               | non TNBC                           | 31 | 63.3         | 12 | 80.0            | 16 | 66.7                      | 1477 | 77.2                                      |                                                              |                                                             |        |
|                               | TNBC                               | 13 | 26.5         | 3  | 20.0            | 3  | 12.5                      | 200  | 10.6                                      | 0.7376                                                       | 0.0017                                                      | 0.4107 |
| Deceased                      |                                    |    |              |    |                 |    |                           |      |                                           |                                                              |                                                             |        |
|                               |                                    | 4  | 8.2          | 1  | 6.7             | 0  | 0.0                       | 50   | 2.6                                       | 1.0000                                                       | 0.0448                                                      | 0.3348 |

**Supplementary Table 9. Multivariate analysis of survival with biallelic inactivation of *BRCA1/2* as a covariate**

|                    | OS           |         |          | DFS          |         |           |
|--------------------|--------------|---------|----------|--------------|---------|-----------|
|                    | Hazard ratio | P-value | 95% CI   | Hazard ratio | P-value | 95% CI    |
| LOH positive       | 2.10E-09     | 1       | 0.0-1.2  | 0.38         | 0.12    | 0.062-1.2 |
| LOH negative       | 1.5          | 0.67    | 0.2-1.1  | 1.8          | 0.36    | 0.44-4.8  |
| larger than T3     | 3.2          | 0.0022  | 1.5-6.7  | 3.0          | <0.0001 | 1.9-4.7   |
| LN status positive | 2.4          | 0.0063  | 1.3-4.6  | 3.4          | <0.0001 | 2.3-5.0   |
| less than 55 y.o.  | 0.88         | 0.68    | 0.47-1.6 | 0.91         | 0.63    | 0.63-1.3  |
| TNBC               | 3.4          | 0.0002  | 1.8-6.6  | 1.7          | 0.031   | 1.1-2.7   |

# Supplementary Figure 1

a

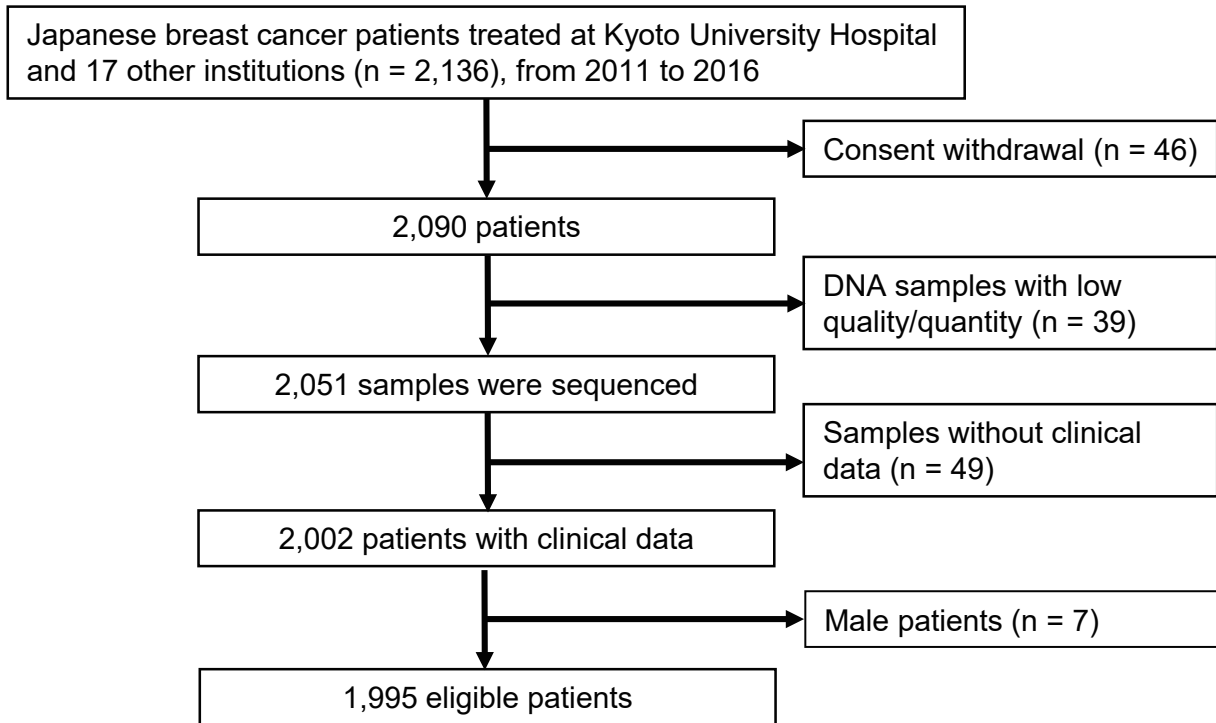

b

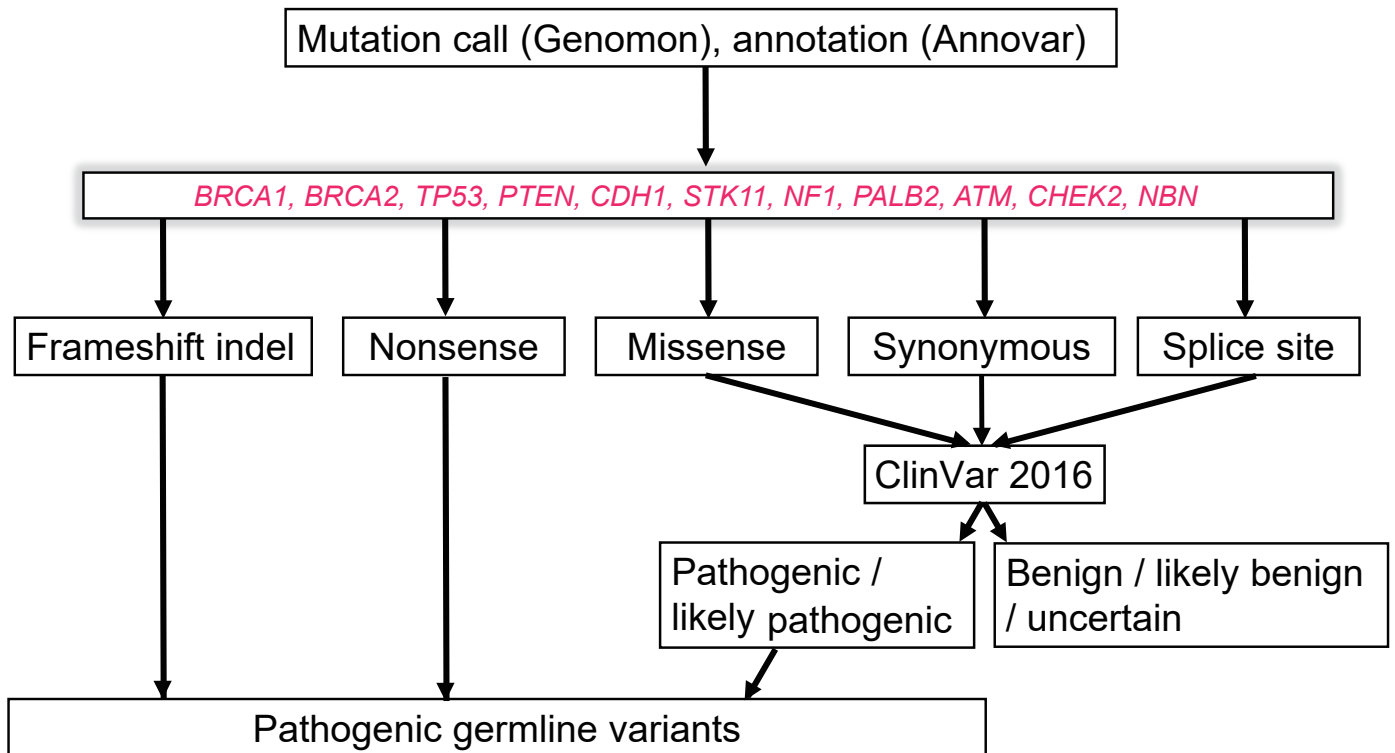



# Supplementary Figure 2

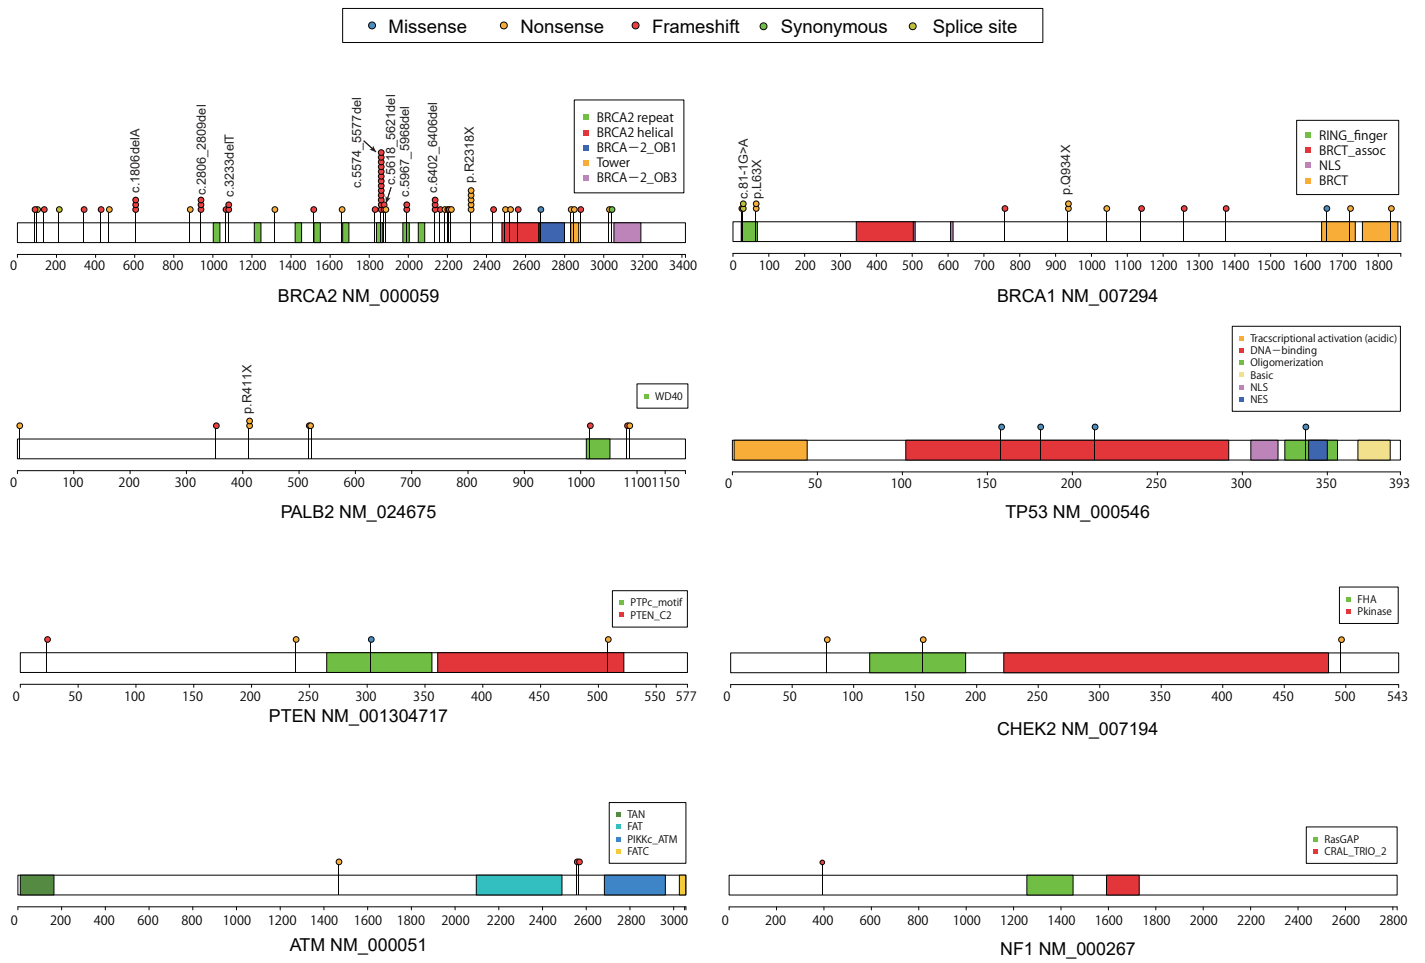

# Supplementary Figure 3

**a**

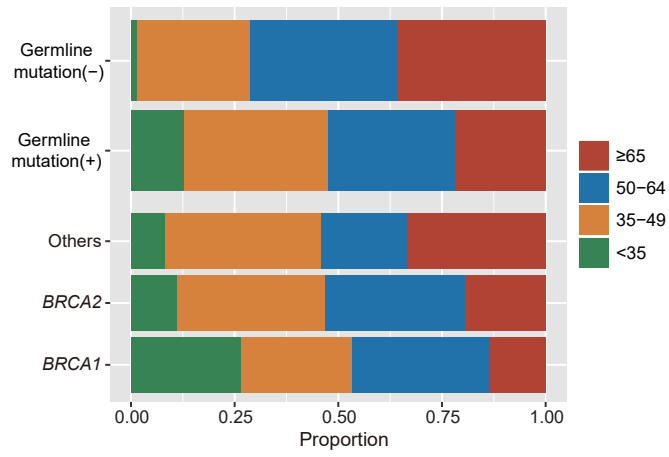

**b**

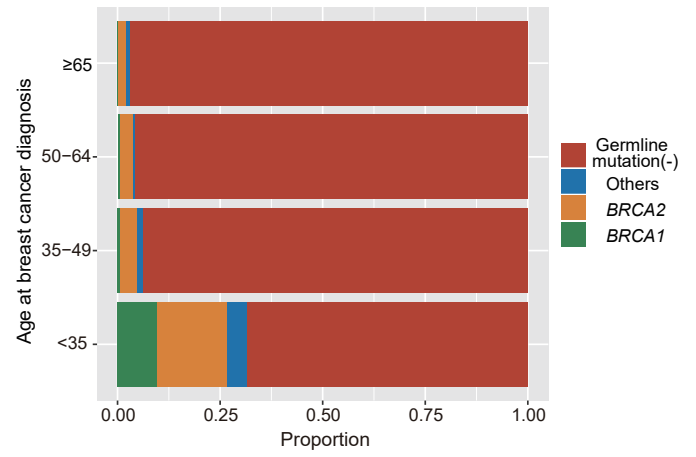

**c**

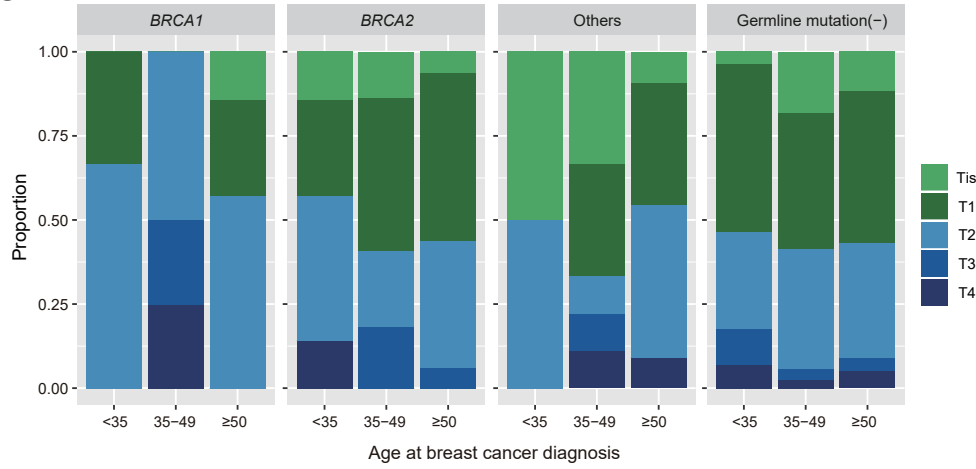

**d**

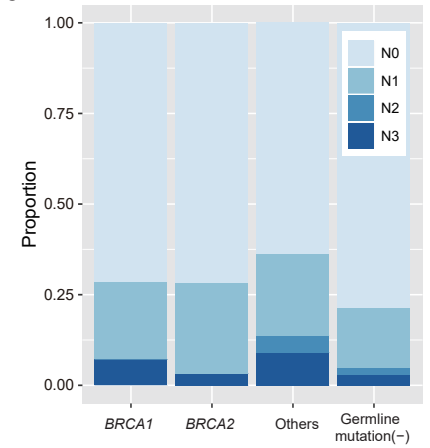

# Supplementary Figure 4

**a**

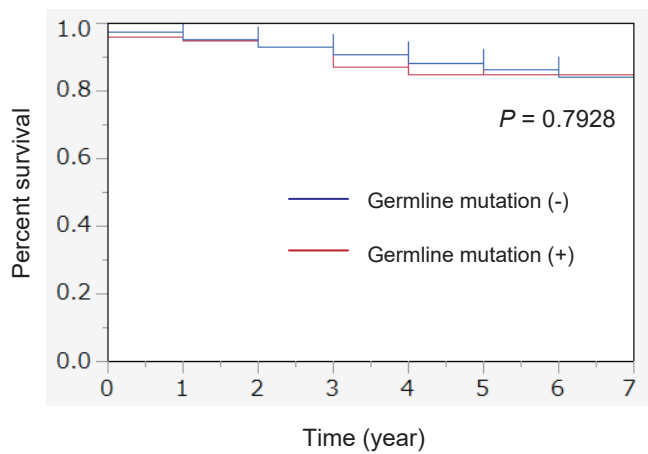

**b**

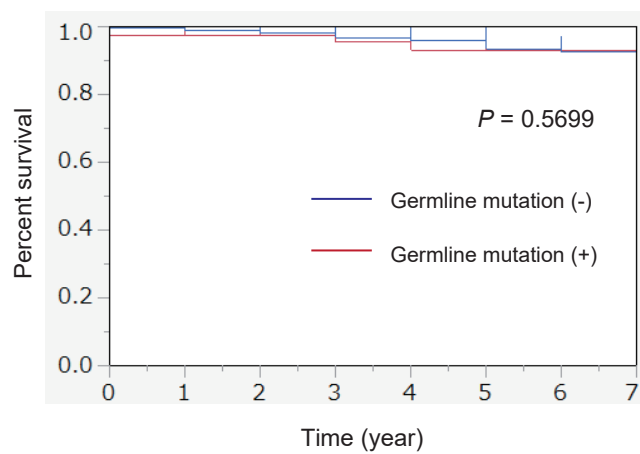

# Supplementary Figure 5

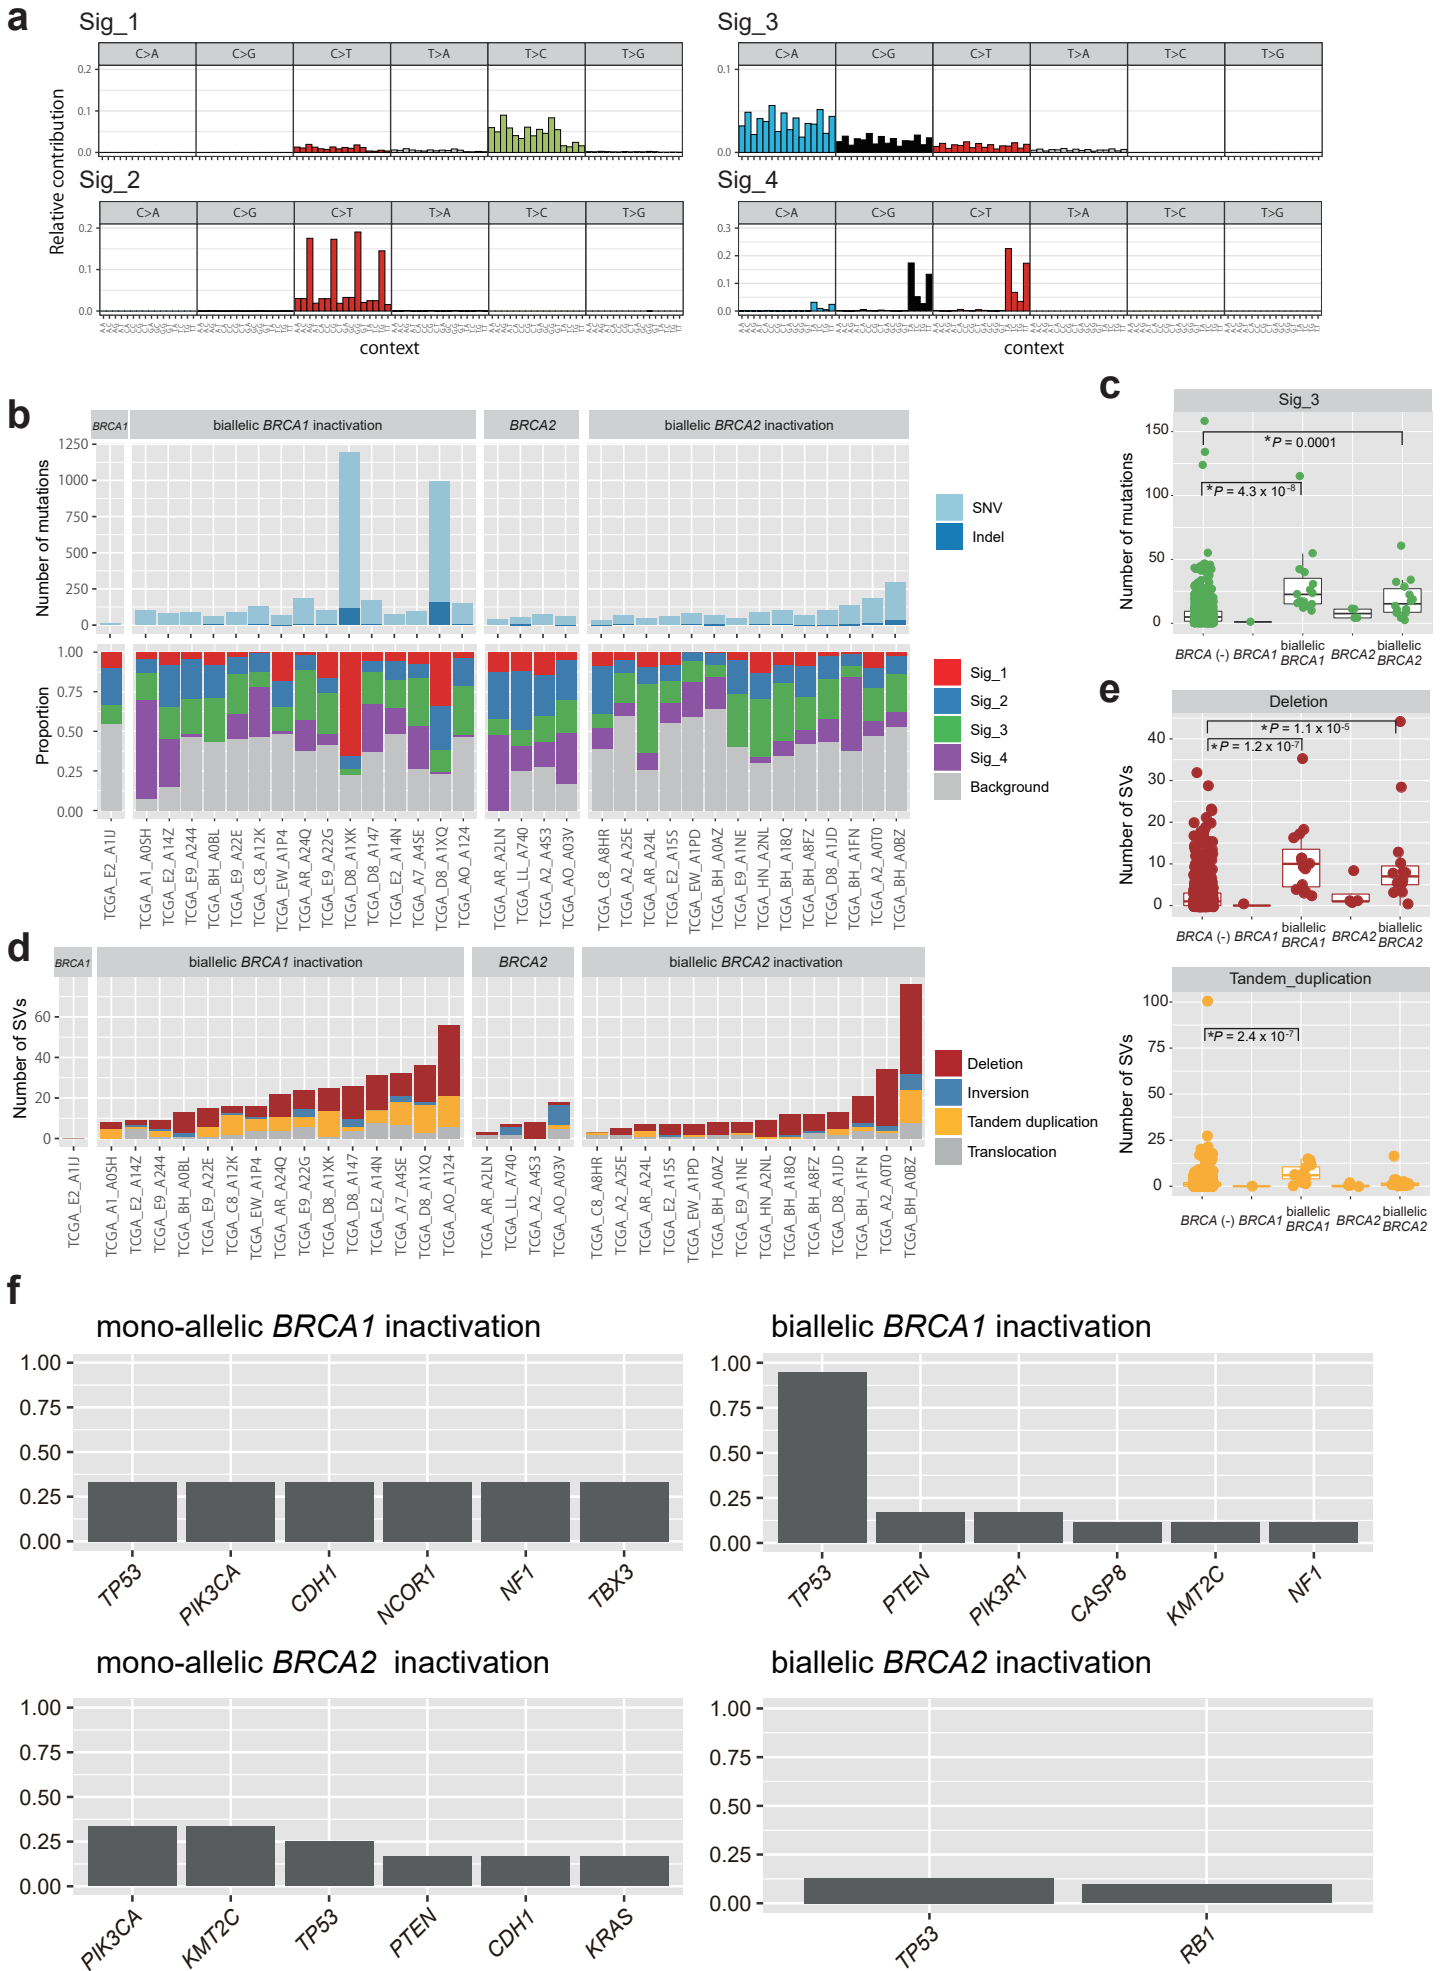

# Supplementary Figure 6

**a**

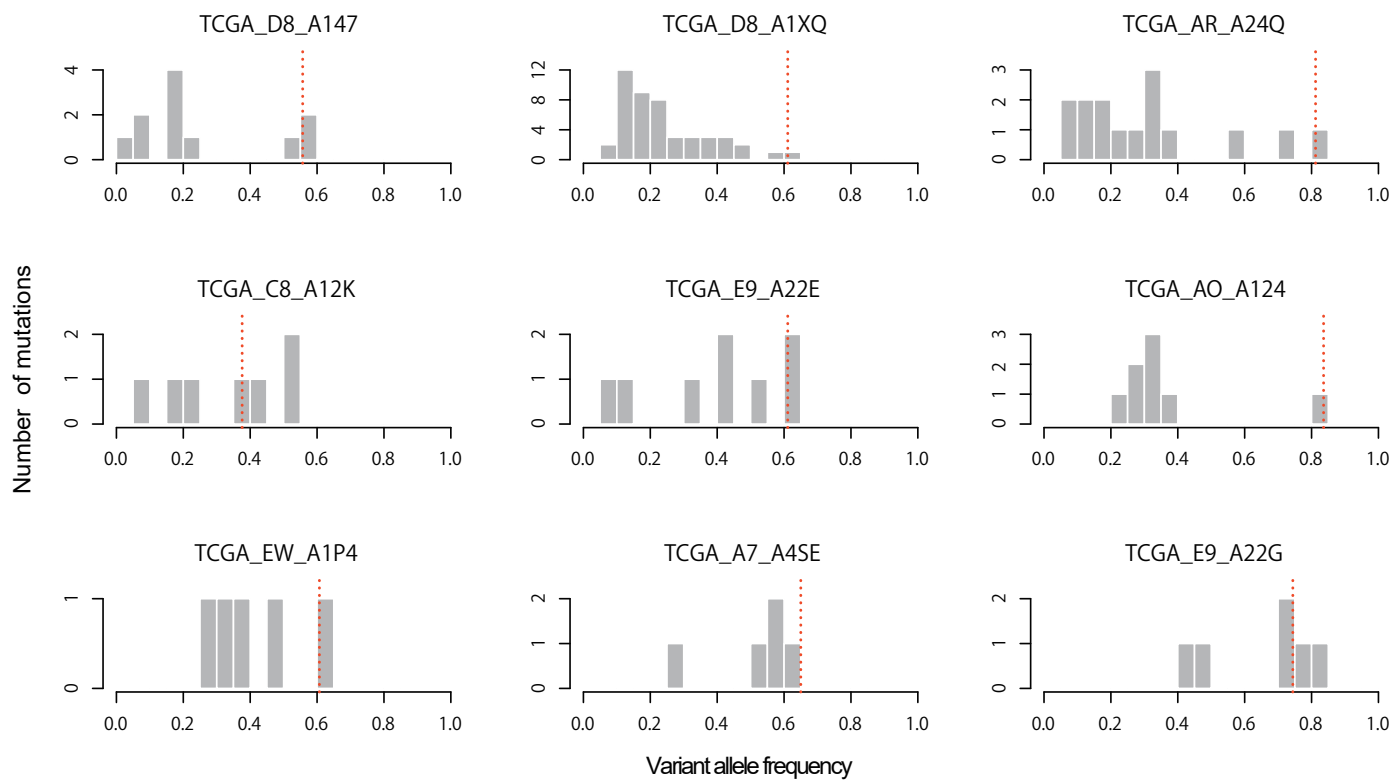

**b**

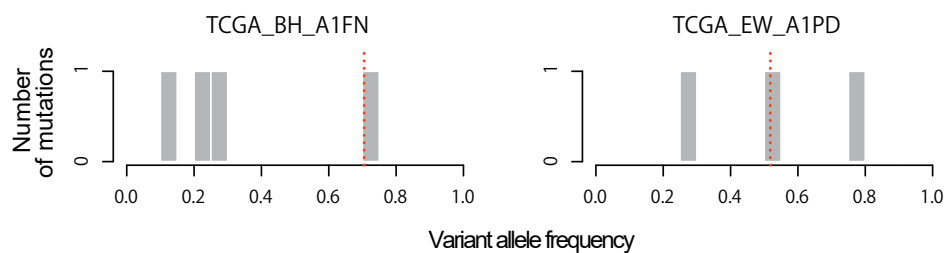

# Supplementary Figure 7

**a**

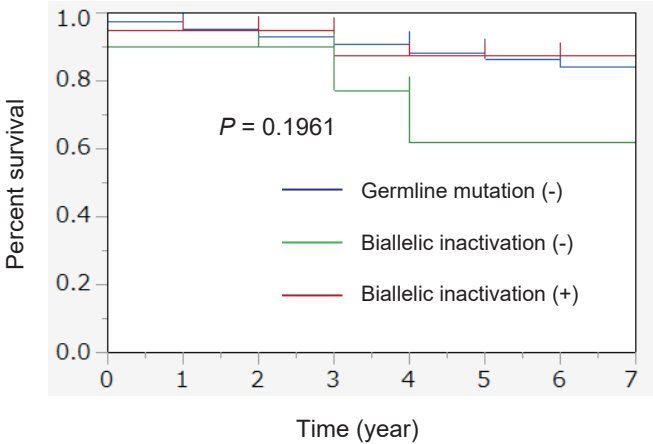

**b**

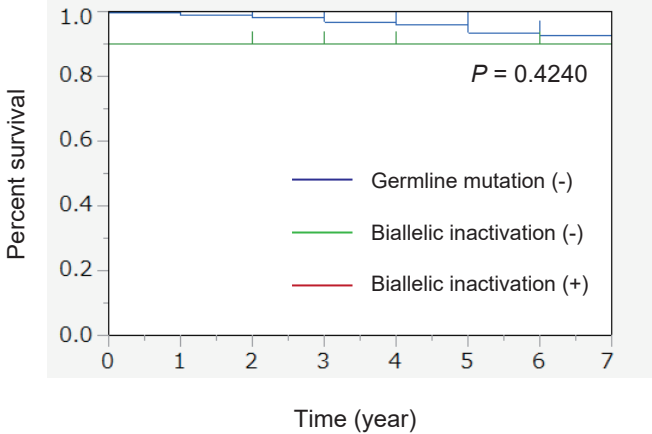

# Supplementary Figure 8

Maxwell et al.

Inagaki-Kawata et al.

**Whole genome amplification (n = 9)**

- TCGA-A2-A0D2
- TCGA-A8-A09A
- TCGA-A8-A097
- TCGA-A8-A09W
- TCGA-B6-A0RG
- TCGA-BH-A0B4
- TCGA-AN-A0AL
- TCGA-AN-A0FL
- TCGA-AN-A0FX

**Low quality of copy number data (n = 3)**

- TCGA\_AC\_A3BB
- TCGA\_AR\_A1AM
- TCGA\_E9\_A3QA

**Low tumor purity (n = 1)**

- TCGA\_EW\_A1P7

**Analysed samples**

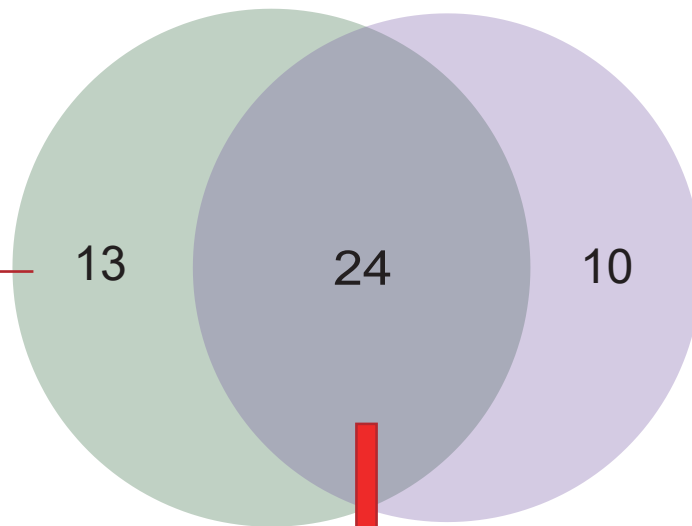

Common samples

|                |                           | Inagaki-Kawata et al.     |                           |
|----------------|---------------------------|---------------------------|---------------------------|
|                |                           | Biallelic inactivation(+) | Biallelic inactivation(-) |
| Maxwell et al. | Biallelic inactivation(+) | 20                        | 0                         |
|                | Biallelic inactivation(-) | 2                         | 2                         |

**Somatic mutations**

- TCGA\_A1\_A0SH
- TCGA\_A2\_A0T0

# Supplementary Figure 9

a

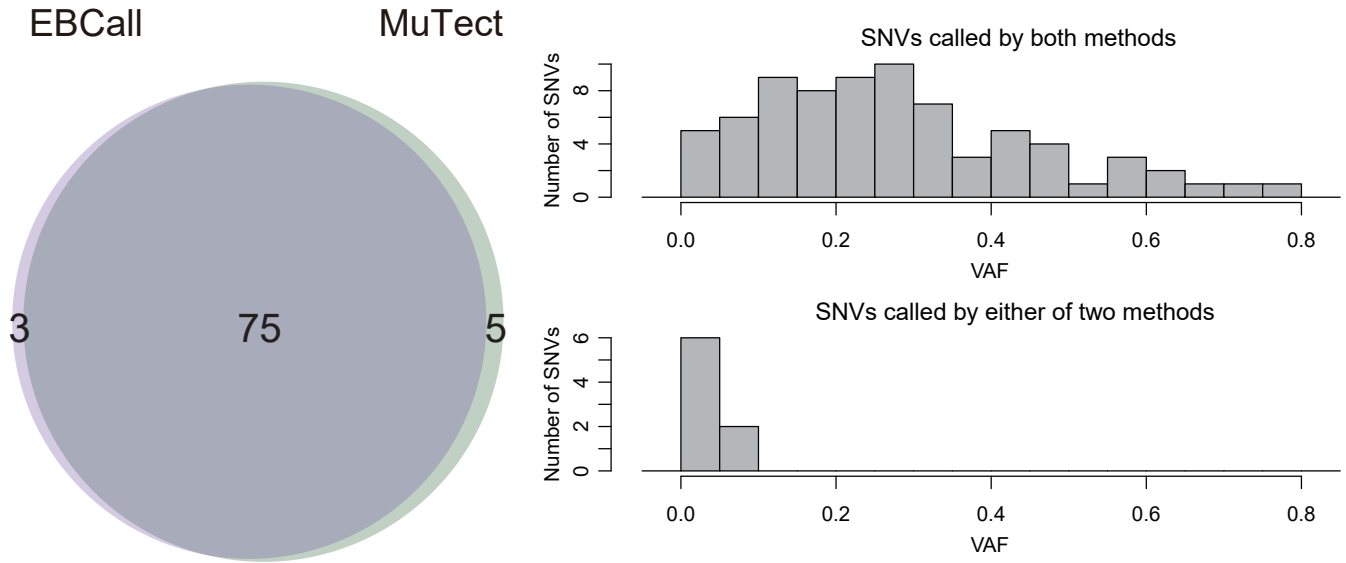

b

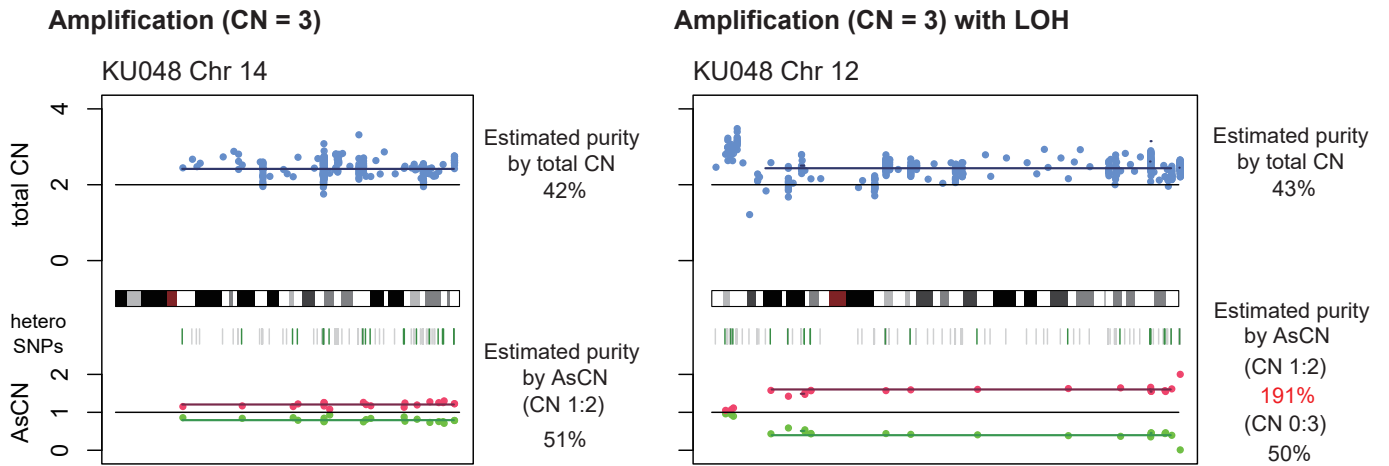

c

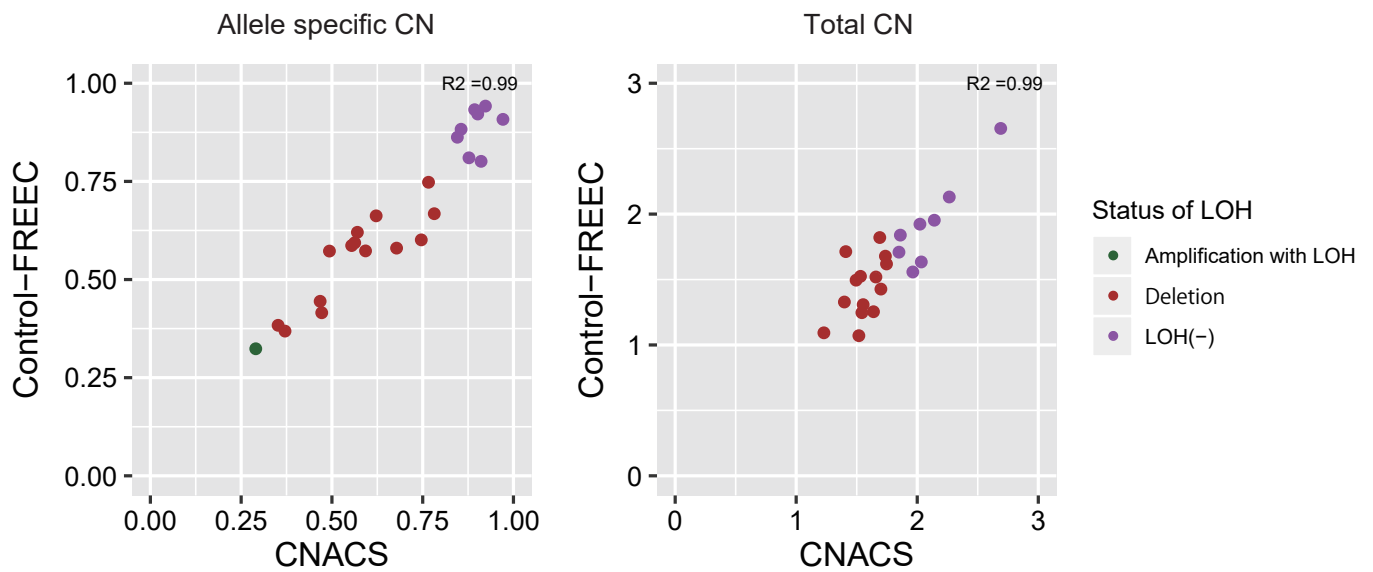



# Supplementary Figure 10

## KU003

### CNACS

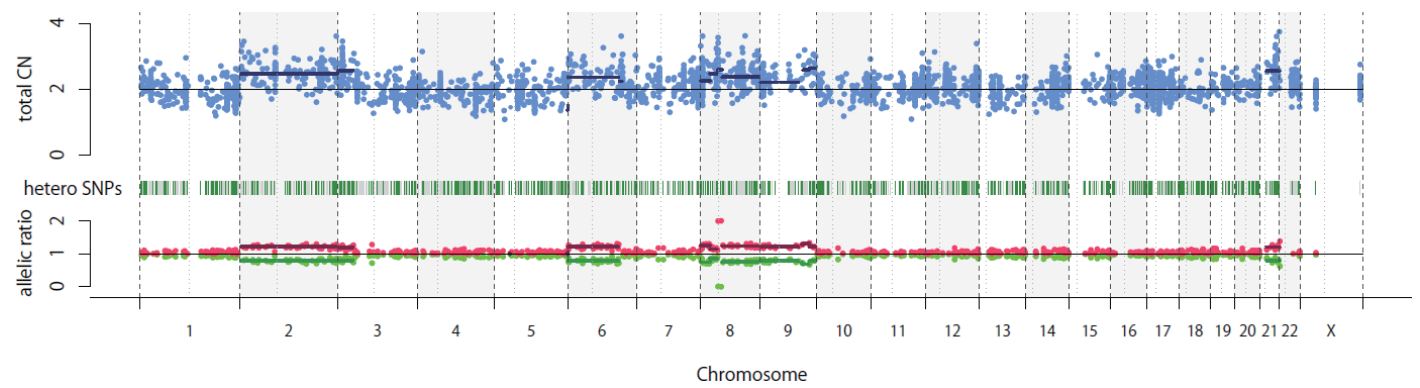

### SNP array

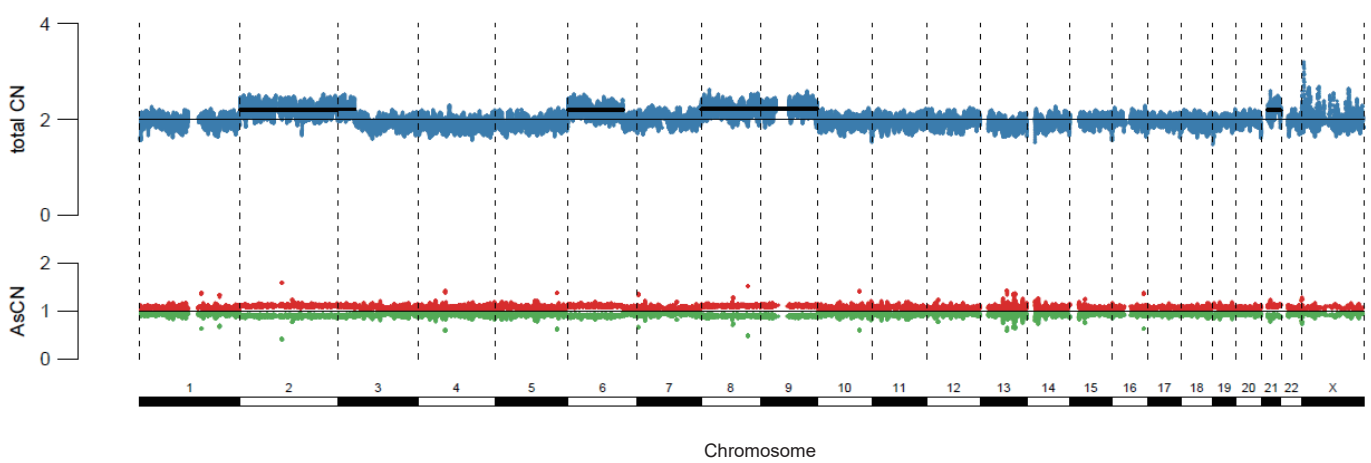

## KU006

### CNACS

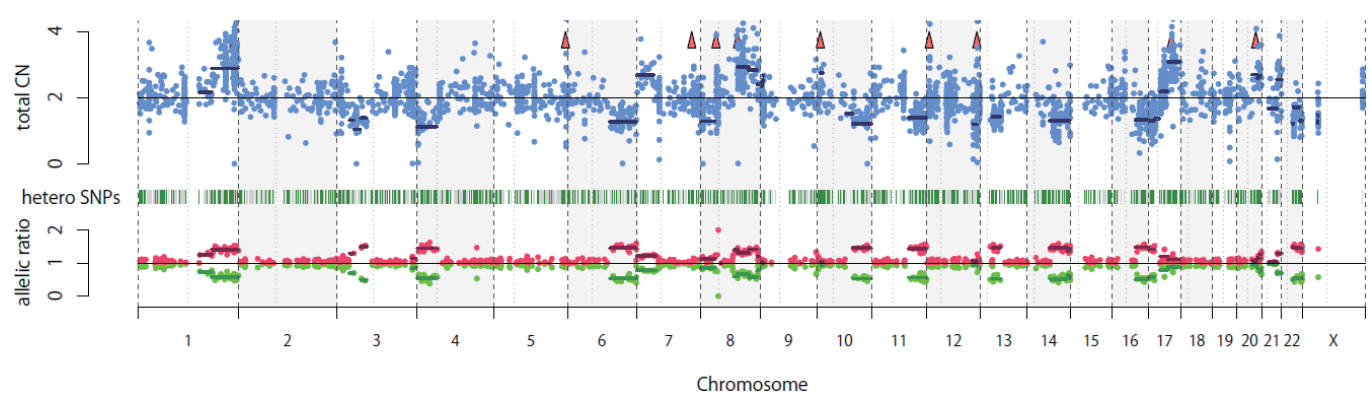

### SNP array

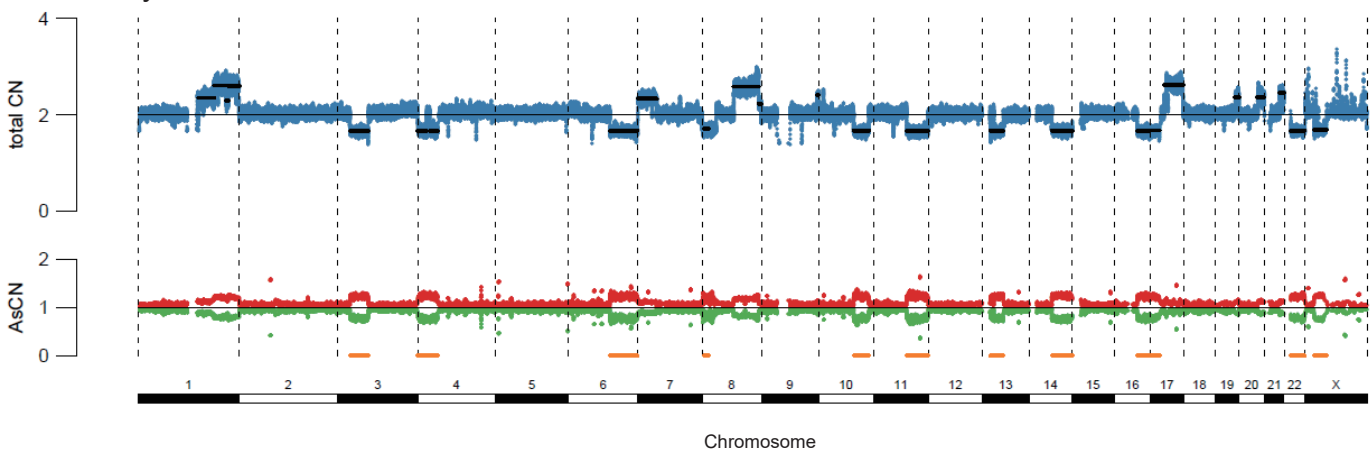

# KU012

## CNACS

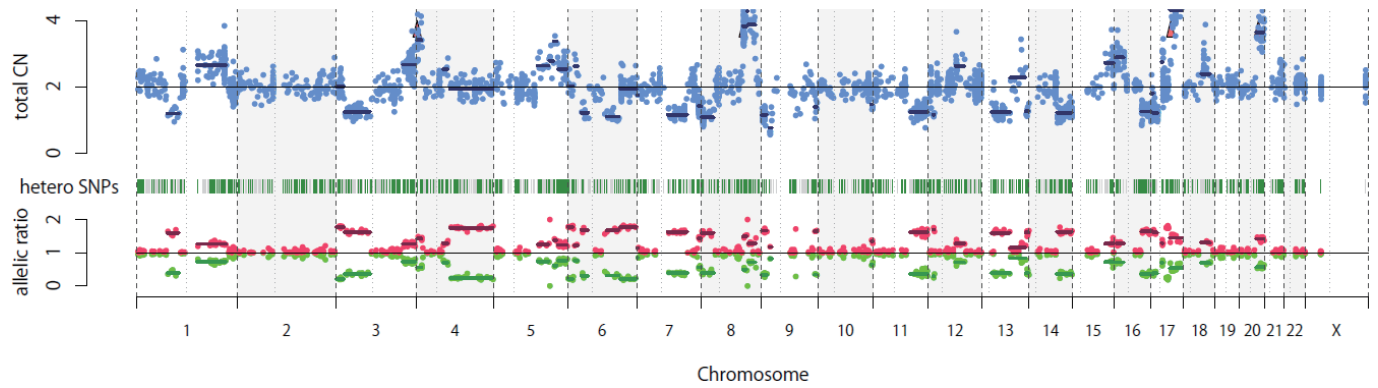

## SNP array

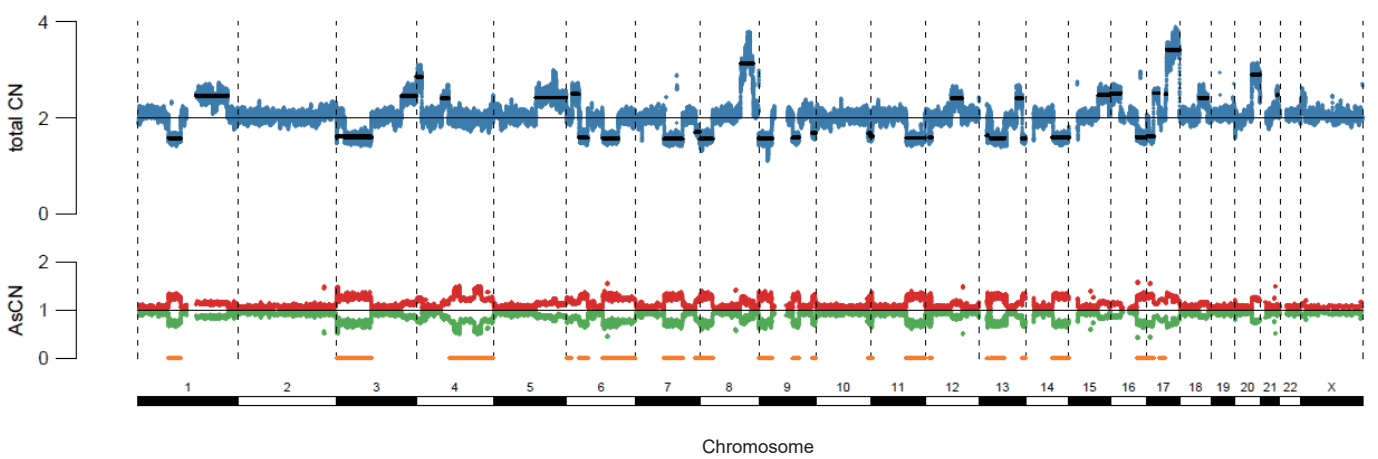

# KU014

## CNACS

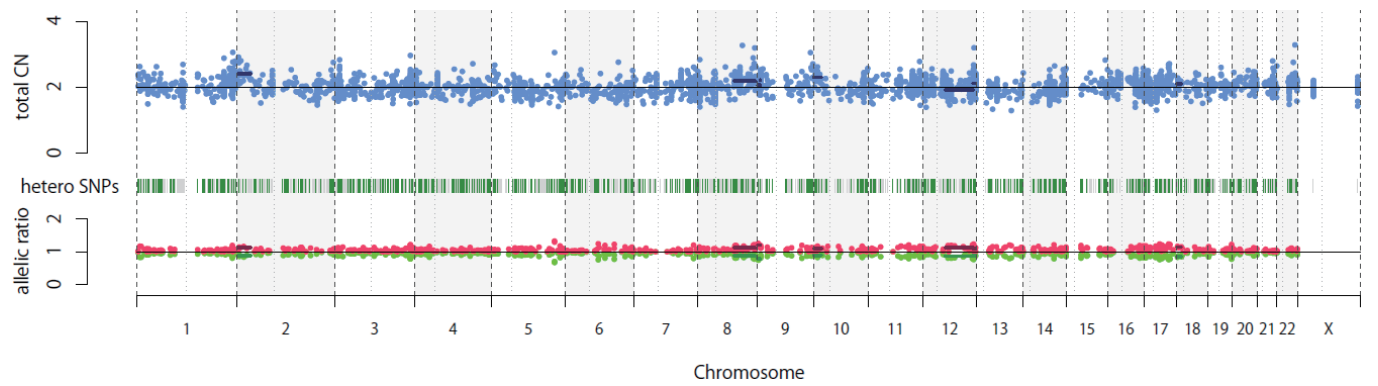

## SNP array

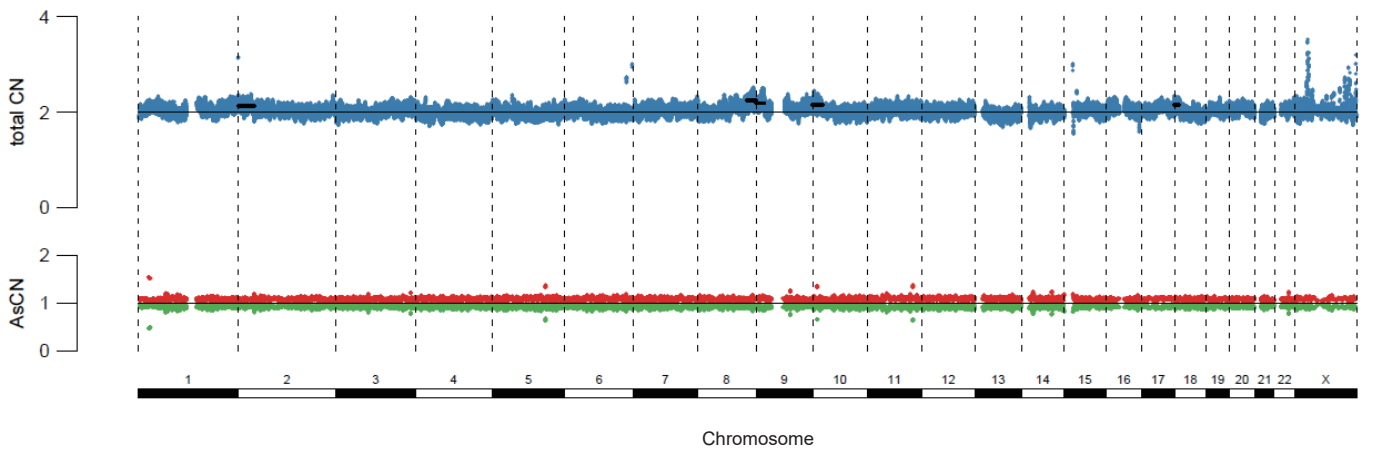

# KU028

## CNACS

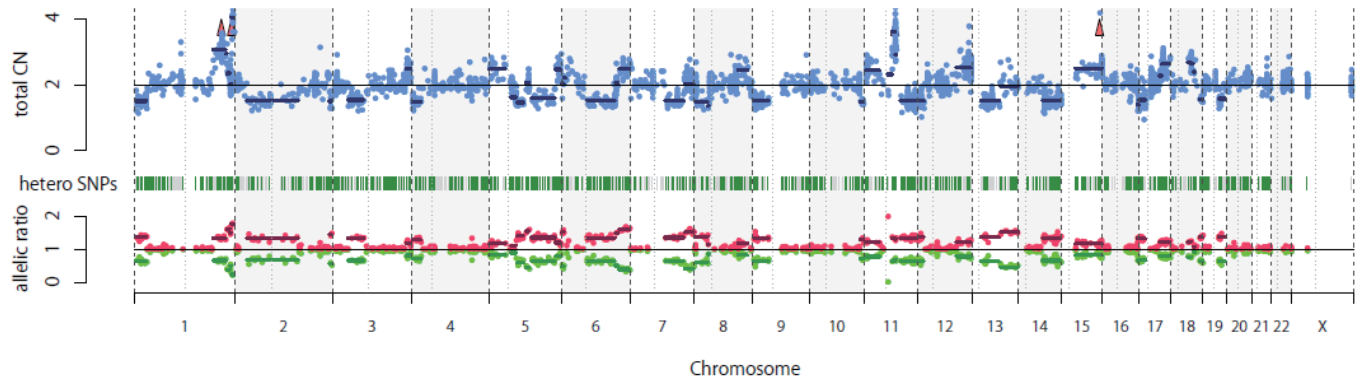

## SNP array

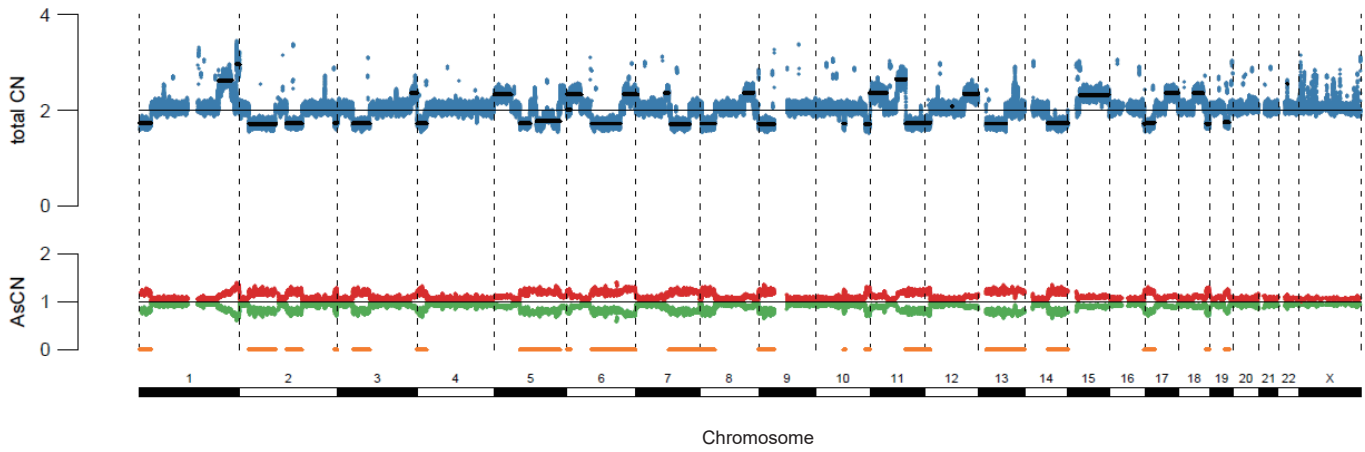

Supplement: 42003_2020_1301_MOESM1_ESM.pdf [file 42003_2020_1301_MOESM1_ESM.pdf]
