# Supplementary material for: Genetic and clinical landscape of breast cancers with germline BRCA1/2 variants
Source: PubMed Central journal article supplement (PMC7567851; doi:10.1038/s42003-020-01301-9), 2020-10-16
Supplement: 42003_2020_1301_MOESM2_ESM.pdf [file 42003_2020_1301_MOESM2_ESM.pdf]

## **Description of Additional Supplementary Files**

File Name: Supplementary Data 1

Description: Data source of Figure 1b-1d.

File Name: Supplementary Data 2

Description: Data source of Figure 2a-2b.

File Name: Supplementary Data 3

Description: Data source of Figure 3a-3e.

File Name: Supplementary Data 4

Description: Data source of Figure 4a-d.
